# Supplementary material
Source: publisher figshare collection journal article supplement (https://acs.figshare.com/ndownloader/files/20180066)
Supplement: Supplementary file 1 [file 20180066]

## Sheet: TableS1-IEPOX
	Table S1. Results of IPA miRNA-mRNA target analysis. miRNAs, their SOA-altered fold change and known gene targets known to be responsive to IEPOX, or combined isoprene-derived SOA are listed. Also listed is the expression pairing indicating the direction (increased/decreased) of expression with respect to the control of both the mRNA and miRNA, respectively. Genes known to be responsive and their…
	miRNA	miRNA Expression Fold Change	Gene Target	mRNA Expression Fold Change*	Associated Pathway	Expression Pairing	Gene expressed in BEAS2B
	hsa-miR-1260a	-4.238	LHPP	1.63		↑↓	Y
	hsa-miR-141-3p	-2.576	PDLIM1	-1.54		↓↓	Y
	hsa-miR-24-3p	-2.861	EPX	-1.84		↓↓	Y
	hsa-miR-4443	-1.726	EPX	-1.84		↓↓	Y
	hsa-miR-4443	-1.726	LHPP	1.63		↑↓	Y
	hsa-miR-4443	-1.726	SRXN1	5.02		↑↓	Y
	hsa-miR-503-5p	-1.805	LHPP	1.63		↑↓	Y
	hsa-miR-16-5p	-7.823	JUN	6.04	14-3-3-mediated Signaling,4-1BB Signaling in T Lymphocytes,Activation of IRF by Cytosolic Pattern Recognition Receptors,Acute Phase Response Signaling,Agrin Interactions at Neuromuscular Junction,Androgen Signaling,Apelin Endothelial Signaling Pathway,April Mediated Signaling,Aryl Hydrocarbon Receptor Signaling,ATM Signaling,B Cell Activating Factor Signaling,B Cell Receptor Signaling,BMP signali…	↑↓	Y
	hsa-miR-30e-5p	-12.674	JUN	6.04	14-3-3-mediated Signaling,4-1BB Signaling in T Lymphocytes,Activation of IRF by Cytosolic Pattern Recognition Receptors,Acute Phase Response Signaling,Agrin Interactions at Neuromuscular Junction,Androgen Signaling,Apelin Endothelial Signaling Pathway,April Mediated Signaling,Aryl Hydrocarbon Receptor Signaling,ATM Signaling,B Cell Activating Factor Signaling,B Cell Receptor Signaling,BMP signali…	↑↓	Y
	hsa-miR-221-3p	-2.503	FOS	12.59	14-3-3-mediated Signaling,Acute Phase Response Signaling,Adrenomedullin signaling pathway,Apelin Endothelial Signaling Pathway,April Mediated Signaling,Aryl Hydrocarbon Receptor Signaling,B Cell Activating Factor Signaling,CCR5 Signaling in Macrophages,CD27 Signaling in Lymphocytes,CD28 Signaling in T Helper Cells,CD40 Signaling,Cdc42 Signaling,Ceramide Signaling,Chemokine Signaling,Cholecystokin…	↑↓	Y
	hsa-miR-29c-3p	-4.352	FOS	12.59	14-3-3-mediated Signaling,Acute Phase Response Signaling,Adrenomedullin signaling pathway,Apelin Endothelial Signaling Pathway,April Mediated Signaling,Aryl Hydrocarbon Receptor Signaling,B Cell Activating Factor Signaling,CCR5 Signaling in Macrophages,CD27 Signaling in Lymphocytes,CD28 Signaling in T Helper Cells,CD40 Signaling,Cdc42 Signaling,Ceramide Signaling,Chemokine Signaling,Cholecystokin…	↑↓	Y
	hsa-let-7d-5p	-3.161	HMOX1	6.05	Acute Phase Response Signaling,Antioxidant Action of Vitamin C,Choline Biosynthesis III,Endothelin-1 Signaling,Fcγ Receptor-mediated Phagocytosis in Macrophages and Monocytes,Gαq Signaling,Heme Degradation,IL-10 Signaling,IL-8 Signaling,Iron homeostasis signaling pathway,mTOR Signaling,Neuroinflammation Signaling Pathway,NRF2-mediated Oxidative Stress Response,Pancreatic Adenocarcinoma Signaling,…	↑↓	Y
	hsa-miR-148b-3p	-3.022	HMOX1	6.05	Acute Phase Response Signaling,Antioxidant Action of Vitamin C,Choline Biosynthesis III,Endothelin-1 Signaling,Fcγ Receptor-mediated Phagocytosis in Macrophages and Monocytes,Gαq Signaling,Heme Degradation,IL-10 Signaling,IL-8 Signaling,Iron homeostasis signaling pathway,mTOR Signaling,Neuroinflammation Signaling Pathway,NRF2-mediated Oxidative Stress Response,Pancreatic Adenocarcinoma Signaling,…	↑↓	Y
	hsa-miR-16-5p	-7.823	HMOX1	6.05	Acute Phase Response Signaling,Antioxidant Action of Vitamin C,Choline Biosynthesis III,Endothelin-1 Signaling,Fcγ Receptor-mediated Phagocytosis in Macrophages and Monocytes,Gαq Signaling,Heme Degradation,IL-10 Signaling,IL-8 Signaling,Iron homeostasis signaling pathway,mTOR Signaling,Neuroinflammation Signaling Pathway,NRF2-mediated Oxidative Stress Response,Pancreatic Adenocarcinoma Signaling,…	↑↓	Y
	hsa-miR-4443	-1.726	HMOX1	6.05	Acute Phase Response Signaling,Antioxidant Action of Vitamin C,Choline Biosynthesis III,Endothelin-1 Signaling,Fcγ Receptor-mediated Phagocytosis in Macrophages and Monocytes,Gαq Signaling,Heme Degradation,IL-10 Signaling,IL-8 Signaling,Iron homeostasis signaling pathway,mTOR Signaling,Neuroinflammation Signaling Pathway,NRF2-mediated Oxidative Stress Response,Pancreatic Adenocarcinoma Signaling,…	↑↓	Y
	hsa-miR-125b-5p	-8.694	IL6R	13.11	Acute Phase Response Signaling,Cardiac Hypertrophy Signaling,Cardiac Hypertrophy Signaling (Enhanced),Colorectal Cancer Metastasis Signaling,Hepatic Fibrosis / Hepatic Stellate Cell Activation,IL-6 Signaling,Iron homeostasis signaling pathway,Neuroinflammation Signaling Pathway,Role of JAK family kinases in IL-6-type Cytokine Signaling,Role of Macrophages, Fibroblasts and Endothelial Cells in Rhe…	↑↓	Y
	hsa-miR-1260a	-4.238	IL6R	13.11	Acute Phase Response Signaling,Cardiac Hypertrophy Signaling,Cardiac Hypertrophy Signaling (Enhanced),Colorectal Cancer Metastasis Signaling,Hepatic Fibrosis / Hepatic Stellate Cell Activation,IL-6 Signaling,Iron homeostasis signaling pathway,Neuroinflammation Signaling Pathway,Role of JAK family kinases in IL-6-type Cytokine Signaling,Role of Macrophages, Fibroblasts and Endothelial Cells in Rhe…	↑↓	Y
	hsa-miR-378h	-2.576	IL6R	13.11	Acute Phase Response Signaling,Cardiac Hypertrophy Signaling,Cardiac Hypertrophy Signaling (Enhanced),Colorectal Cancer Metastasis Signaling,Hepatic Fibrosis / Hepatic Stellate Cell Activation,IL-6 Signaling,Iron homeostasis signaling pathway,Neuroinflammation Signaling Pathway,Role of JAK family kinases in IL-6-type Cytokine Signaling,Role of Macrophages, Fibroblasts and Endothelial Cells in Rhe…	↑↓	Y
	hsa-miR-29c-3p	-4.352	HDAC4	-2.22	Adipogenesis pathway,Apelin Endothelial Signaling Pathway,Calcium Signaling,Cardiac Hypertrophy Signaling (Enhanced),Cell Cycle: G1/S Checkpoint Regulation,Chronic Myeloid Leukemia Signaling,Cyclins and Cell Cycle Regulation,Hereditary Breast Cancer Signaling,Huntington's Disease Signaling,Osteoarthritis Pathway,Phospholipase C Signaling,Role of NFAT in Cardiac Hypertrophy,Telomerase Signaling,Xe…	↓↓	Y
	hsa-miR-16-5p	-7.823	HSPA1A	9.47	Aldosterone Signaling in Epithelial Cells,BAG2 Signaling Pathway,eNOS Signaling,Glucocorticoid Receptor Signaling,Huntington's Disease Signaling,Protein Ubiquitination Pathway,Unfolded protein response	↑↓	Y
	hsa-miR-148b-3p	-3.022	CAT	-2.11	Amyotrophic Lateral Sclerosis Signaling,Apelin Adipocyte Signaling Pathway,Apelin Cardiomyocyte Signaling Pathway,Ethanol Degradation IV,LPS/IL-1 Mediated Inhibition of RXR Function,Mitochondrial Dysfunction,NRF2-mediated Oxidative Stress Response,Production of Nitric Oxide and Reactive Oxygen Species in Macrophages,Superoxide Radicals Degradation,Xenobiotic Metabolism Signaling	↓↓	N
	hsa-miR-30e-5p	-12.674	CAT	-2.11	Amyotrophic Lateral Sclerosis Signaling,Apelin Adipocyte Signaling Pathway,Apelin Cardiomyocyte Signaling Pathway,Ethanol Degradation IV,LPS/IL-1 Mediated Inhibition of RXR Function,Mitochondrial Dysfunction,NRF2-mediated Oxidative Stress Response,Production of Nitric Oxide and Reactive Oxygen Species in Macrophages,Superoxide Radicals Degradation,Xenobiotic Metabolism Signaling	↓↓	N
	hsa-miR-324-5p	-5.775	TXNRD1	2.16	Antioxidant Action of Vitamin C,NRF2-mediated Oxidative Stress Response,Thioredoxin Pathway,Vitamin-C Transport	↑↓	Y
	hsa-miR-4531	-3.487	TXNRD1	2.16	Antioxidant Action of Vitamin C,NRF2-mediated Oxidative Stress Response,Thioredoxin Pathway,Vitamin-C Transport	↑↓	Y
	hsa-miR-27b-3p	-4.637	MEF2C	-3.03	Apelin Endothelial Signaling Pathway,B Cell Receptor Signaling,Calcium Signaling,Cardiac Hypertrophy Signaling,Cardiac Hypertrophy Signaling (Enhanced),Cardiomyocyte Differentiation via BMP Receptors,Cholecystokinin/Gastrin-mediated Signaling,Corticotropin Releasing Hormone Signaling,ERK5 Signaling,Factors Promoting Cardiogenesis in Vertebrates,Gα12/13 Signaling,Osteoarthritis Pathway,p38 MAPK Si…	↓↓	Y
	hsa-miR-16-5p	-7.823	ALOX12	1.75	Atherosclerosis Signaling,Eicosanoid Signaling,IL-12 Signaling and Production in Macrophages	↑↓	Y
	hsa-miR-503-5p	-1.805	ALOX12	1.75	Atherosclerosis Signaling,Eicosanoid Signaling,IL-12 Signaling and Production in Macrophages	↑↓	Y
	hsa-miR-16-5p	-7.823	SQSTM1	2.04	Autophagy,FAT10 Signaling Pathway,NRF2-mediated Oxidative Stress Response	↑↓	Y
	hsa-miR-20a-5p	-2.897	SQSTM1	2.04	Autophagy,FAT10 Signaling Pathway,NRF2-mediated Oxidative Stress Response	↑↓	Y
	hsa-miR-30e-5p	-12.674	BCL6	1.97	B Cell Receptor Signaling,IL-7 Signaling Pathway,T Cell Exhaustion Signaling Pathway,T Helper Cell Differentiation	↑↓	Y
	hsa-miR-141-3p	-2.576	BAG2	1.67	BAG2 Signaling Pathway	↑↓	Y
	hsa-miR-27b-3p	-4.637	BAG2	1.67	BAG2 Signaling Pathway	↑↓	Y
	hsa-miR-549a	-4.407	BAG2	1.67	BAG2 Signaling Pathway	↑↓	Y
	hsa-let-7d-5p	-3.161	PTGS2	2.85	Cancer Drug Resistance By Drug Efflux,Cardiac Hypertrophy Signaling (Enhanced),CD40 Signaling,Cholecystokinin/Gastrin-mediated Signaling,Colorectal Cancer Metastasis Signaling,Corticotropin Releasing Hormone Signaling,Eicosanoid Signaling,Endocannabinoid Neuronal Synapse Pathway,Endothelin-1 Signaling,Fatty Acid α-oxidation,Glucocorticoid Receptor Signaling,HGF Signaling,IL-17 Signaling,IL-8 Sign…	↑↓	Y
	hsa-miR-16-5p	-7.823	PTGS2	2.85	Cancer Drug Resistance By Drug Efflux,Cardiac Hypertrophy Signaling (Enhanced),CD40 Signaling,Cholecystokinin/Gastrin-mediated Signaling,Colorectal Cancer Metastasis Signaling,Corticotropin Releasing Hormone Signaling,Eicosanoid Signaling,Endocannabinoid Neuronal Synapse Pathway,Endothelin-1 Signaling,Fatty Acid α-oxidation,Glucocorticoid Receptor Signaling,HGF Signaling,IL-17 Signaling,IL-8 Sign…	↑↓	Y
	hsa-miR-16-5p	-7.823	CYGB	1.55	Ethanol Degradation IV,Superoxide Radicals Degradation	↑↓	Y
	hsa-miR-378h	-2.576	CYGB	1.55	Ethanol Degradation IV,Superoxide Radicals Degradation	↑↓	Y
	hsa-miR-16-5p	-7.823	GCLC	2.31	Glutathione Biosynthesis,NRF2-mediated Oxidative Stress Response,Xenobiotic Metabolism Signaling,γ-glutamyl Cycle	↑↓	Y
	hsa-miR-30e-5p	-12.674	GCLC	2.31	Glutathione Biosynthesis,NRF2-mediated Oxidative Stress Response,Xenobiotic Metabolism Signaling,γ-glutamyl Cycle	↑↓	Y
	hsa-miR-4443	-1.726	GCLM	2.36	Glutathione Biosynthesis,NRF2-mediated Oxidative Stress Response,γ-glutamyl Cycle	↑↓	Y
	hsa-miR-148b-3p	-3.022	IL23R	2.57	IL-12 Signaling and Production in Macrophages,IL-23 Signaling Pathway,T Helper Cell Differentiation,Th17 Activation Pathway	↑↓	N
	hsa-miR-1260a	-4.238	MAFF	9.53	NRF2-mediated Oxidative Stress Response	↑↓	Y
	hsa-miR-1260a	-4.238	MAFG	2.06	NRF2-mediated Oxidative Stress Response	↑↓	Y
	hsa-miR-1260a	-4.238	MAFK	1.92	NRF2-mediated Oxidative Stress Response	↑↓	Y
	hsa-miR-148b-3p	-3.022	MAFF	9.53	NRF2-mediated Oxidative Stress Response	↑↓	Y
	hsa-miR-148b-3p	-3.022	MAFG	2.06	NRF2-mediated Oxidative Stress Response	↑↓	Y
	hsa-miR-16-5p	-7.823	MAFK	1.92	NRF2-mediated Oxidative Stress Response	↑↓	Y
	hsa-miR-24-3p	-2.861	MAFG	2.06	NRF2-mediated Oxidative Stress Response	↑↓	Y
	hsa-miR-29c-3p	-4.352	MAFG	2.06	NRF2-mediated Oxidative Stress Response	↑↓	Y
	hsa-miR-324-5p	-5.775	MAFK	1.92	NRF2-mediated Oxidative Stress Response	↑↓	Y
	hsa-miR-378h	-2.576	MAFF	9.53	NRF2-mediated Oxidative Stress Response	↑↓	Y
	hsa-miR-423-3p	-2.049	MAFG	2.06	NRF2-mediated Oxidative Stress Response	↑↓	Y
	* from Lin et al 2016, Arashiro et al. 2017

## Sheet: TableS2-MAE
	Table S2. Results of IPA miRNA-mRNA target analysis. miRNAs, their SOA-altered fold change and their gene targets known to be responsive to MAE, or combined isoprene-derived SOA are listed. Also listed is the expression pairing indicating the direction (increased/decreased) of expression with respect to the control of both the mRNA and miRNA, respectively. Genes known to be responsive and their f…
	miRNA	miRNA Expression Fold Change	Gene Target	mRNA Expression Fold Change*	Associated Pathways	Expression pairing	Gene expressed in BEAS2B
	hsa-miR-423-5p	2.24	CCL5	23.64	Agranulocyte Adhesion and Diapedesis,CCR5 Signaling in Macrophages,Chemokine Signaling,Communication between Innate and Adaptive Immune Cells,Differential Regulation of Cytokine Production in Intestinal Epithelial Cells by IL-17A and IL-17F,Differential Regulation of Cytokine Production in Macrophages and T Helper Cells by IL-17A and IL-17F,Glucocorticoid Receptor Signaling,Granulocyte Adhesion a…	↑↑	Y
	hsa-miR-423-5p	2.24	MAFF	9.53	NRF2-mediated Oxidative Stress Response	↑↑	Y
	hsa-miR-423-5p	2.24	MAFG	2.06	NRF2-mediated Oxidative Stress Response	↑↑	Y
	hsa-miR-423-5p	2.24	MAFK	1.92	NRF2-mediated Oxidative Stress Response	↑↑	Y
	hsa-miR-423-5p	2.24	NOX4	7.73	Apelin Adipocyte Signaling Pathway,EIF2 Signaling,Factors Promoting Cardiogenesis in Vertebrates,fMLP Signaling in Neutrophils,IL-8 Signaling,Neuroinflammation Signaling Pathway,Phagosome Maturation,Rac Signaling,Signaling by Rho Family GTPases	↑↑	N
	hsa-miR-423-5p	2.24	SQSTM1	4.57	Autophagy,FAT10 Signaling Pathway,NRF2-mediated Oxidative Stress Response	↑↑	Y
	hsa-miR-4284	2.99	GCLC	2.31	Glutathione Biosynthesis,NRF2-mediated Oxidative Stress Response,Xenobiotic Metabolism Signaling,γ-glutamyl Cycle	↑↑	Y
	* from Lin et al 2016, Arashiro et al. 2017
